# Supplementary material
Source: PubMed Central journal article supplement (PMC4031946)
Supplement: supp_M047357_jlr.M047357-1.pdf [file supp_M047357_jlr.M047357-1.pdf]

## SUPPLEMENTARY TABLES

**Table S1: LC-MS/MS conditions used to determine the AA-, EPA- and DHA-derived metabolites.**

| Compound Name            | ISTD   | Precursor Ion [m/z] | Product Ion [m/z] | Fragmentor Voltage [V] | Collision Energy [V] | Cell Accelerator Voltage [V] | Retention Time [min] |
|--------------------------|--------|---------------------|-------------------|------------------------|----------------------|------------------------------|----------------------|
| d17-6-keto-PGF1 $\alpha$ | 1      | 367,0               | 163,0             | 120                    | 20                   | 1                            | 4,87                 |
| 6-keto-PGF1 $\alpha$     | 1      | 369,2               | 163,0             | 130                    | 24                   | 8                            | 4,90                 |
| TXB3                     | 1      | 367,2               | 169,1             | 100                    | 10                   | 1                            | 5,12                 |
| TXB2                     | 1      | 369,2               | 195,0             | 100                    | 9                    | 1                            | 5,25                 |
| PGE3                     | 1      | 349,2               | 269,2             | 130                    | 7                    | 6                            | 5,32                 |
| 11-dehydro TXB3          | 1      | 365,2               | 303,0             | 120                    | 9                    | 4                            | 5,40                 |
| PGE2-d4                  | ISTD-1 | 355,3               | 319,0             | 110                    | 4                    | 5                            | 5,59                 |
| PGE2                     | 1      | 351,3               | 315,0             | 110                    | 4                    | 5                            | 5,61                 |
| 11-dehydro TXB2          | 1      | 367,2               | 305,0             | 140                    | 8                    | 4                            | 5,67                 |
| Resolvin D1              | 2      | 375,2               | 141,1             | 110                    | 9                    | 1                            | 5,96                 |
| LTB5                     | 3      | 333,2               | 195,1             | 130                    | 8                    | 1                            | 6,50                 |
| 17,18-DHEQ               | 2      | 335,2               | 247,1             | 120                    | 10                   | 1                            | 7,10                 |
| LTB4-d4                  | ISTD-2 | 339,2               | 197,1             | 130                    | 7                    | 1                            | 7,32                 |
| LTB4                     | 3      | 335,2               | 195,1             | 130                    | 7                    | 1                            | 7,42                 |
| 14,15-DHEQ               | 3      | 335,2               | 207,1             | 140                    | 11                   | 3                            | 7,45                 |
| 11,12-DHEQ               | 3      | 335,2               | 167,1             | 160                    | 7                    | 1                            | 7,54                 |
| 8,9-DHEQ                 | 3      | 335,2               | 127,1             | 140                    | 15                   | 1                            | 7,70                 |
| 5,6-DHEQ                 | 3      | 335,2               | 145,1             | 120                    | 11                   | 3                            | 8,09                 |
| 14,15-DHET-d11           | ISTD-3 | 348,3               | 207,1             | 120                    | 10                   | 1                            | 8,15                 |
| 19,20-DHDP               | 3      | 361,0               | 273,0             | 130                    | 11                   | 3                            | 8,18                 |
| 14,15-DHET               | 3      | 337,2               | 207,1             | 120                    | 10                   | 1                            | 8,21                 |
| 16,17-DHDP               | 3      | 361,0               | 233,0             | 140                    | 10                   | 2                            | 8,53                 |
| 11,12-DHET               | 3      | 337,2               | 167,1             | 120                    | 12                   | 1                            | 8,59                 |
| 13,14-DHDP               | 3      | 361,0               | 193,0             | 140                    | 10                   | 1                            | 8,65                 |
| 10,11-DHDP               | 3      | 361,0               | 153,0             | 140                    | 11                   | 1                            | 8,85                 |
| 8,9-DHET                 | 3      | 337,2               | 127,1             | 140                    | 15                   | 1                            | 8,91                 |
| 18-HEPE                  | 5      | 317,2               | 259,1             | 140                    | 3                    | 5                            | 9,11                 |
| 20-HEPE                  | 4      | 317,2               | 287,1             | 130                    | 8                    | 1                            | 9,11                 |
| 7,8-DHDP                 | 3      | 361,0               | 113,0             | 140                    | 15                   | 8                            | 9,35                 |

|              |        |       |       |     |    |   |       |
|--------------|--------|-------|-------|-----|----|---|-------|
| 5,6-DHET     | 5      | 337,2 | 145,1 | 130 | 11 | 1 | 9,40  |
| 20-HETE-d6   | ISTD-4 | 325,2 | 295,1 | 130 | 11 | 2 | 9,59  |
| 15-HEPE      | 5      | 317,2 | 219,1 | 120 | 5  | 1 | 9,63  |
| 20-HETE      | 4      | 319,2 | 289,1 | 150 | 11 | 3 | 9,67  |
| 12-HEPE      | 5      | 317,2 | 179,1 | 120 | 5  | 1 | 9,84  |
| 9-HEPE       | 5      | 317,2 | 167,1 | 110 | 5  | 1 | 10,17 |
| 5-HEPE       | 5      | 317,2 | 115,1 | 110 | 6  | 1 | 10,43 |
| 22-HDHA      | 4      | 343,0 | 313,0 | 150 | 8  | 1 | 10,45 |
| 15-HETE-d8   | ISTD-5 | 327,2 | 226,1 | 140 | 4  | 1 | 10,99 |
| 15-HETE      | 5      | 319,2 | 219,1 | 140 | 4  | 8 | 11,13 |
| 17,18-EEQ    | 6      | 317,2 | 259,1 | 120 | 3  | 1 | 11,32 |
| 17-HDHA      | 5      | 343,2 | 201,1 | 110 | 6  | 6 | 11,33 |
| 14-HDHA      | 5      | 343,2 | 205,1 | 110 | 6  | 2 | 11,59 |
| 12-HETE      | 5      | 319,2 | 179,1 | 110 | 5  | 1 | 11,84 |
| 14,15-EEQ    | 6      | 317,2 | 207,1 | 110 | 3  | 4 | 11,95 |
| 9-HETE       | 5      | 319,2 | 151,1 | 130 | 5  | 2 | 12,14 |
| 5-HETE       | 5      | 319,2 | 115,1 | 110 | 10 | 1 | 12,27 |
| 11,12-EEQ    | 6      | 317,2 | 167,1 | 130 | 4  | 1 | 12,41 |
| 8,9-EEQ      | 6      | 317,2 | 255,1 | 110 | 2  | 1 | 12,44 |
| 5,6-EEQ      | 6      | 317,2 | 189,1 | 110 | 2  | 1 | 12,69 |
| 4-HDHA       | 5      | 343,2 | 101,1 | 130 | 7  | 2 | 12,86 |
| 19,20-EDP    | 6      | 343,0 | 241,0 | 160 | 8  | 2 | 13,47 |
| 14,15-EET-d8 | ISTD-6 | 327,2 | 226,1 | 120 | 3  | 8 | 13,80 |
| 14,15-EET    | 6      | 319,2 | 219,1 | 120 | 3  | 1 | 13,88 |
| 16,17-EDP    | 6      | 343,0 | 233,0 | 110 | 4  | 2 | 14,24 |
| 13,14-EDP    | 6      | 343,0 | 234,0 | 120 | 3  | 2 | 14,44 |
| 10,11-EDP    | 6      | 343,0 | 153,0 | 120 | 4  | 1 | 14,55 |
| 11,12-EET    | 6      | 319,2 | 167,1 | 120 | 2  | 1 | 14,70 |
| 4,5-EDP      | 6      | 343,0 | 281,0 | 130 | 6  | 4 | 14,73 |
| 7,8-EDP      | 6      | 343,0 | 109,0 | 130 | 9  | 1 | 14,82 |
| 8,9-EET      | 6      | 319,2 | 155,1 | 120 | 3  | 1 | 14,90 |
| 5,6-EET      | 6      | 319,2 | 191,1 | 120 | 4  | 1 | 15,08 |

---

*Legend: ISTD- internal standard*

**Table S2: Effect of EPA/DHA supplementation on the fatty acid composition in RBCs.** Individual fatty acids are given as percentage of total fatty acids (mean  $\pm$  SEM, n=19). A general linear model for repeated measurements was used for analysis. p<0.05 was considered statistical significant. ns = not significant. Week 0 = basal = W0 and week 8 = maximum treatment = W8.

|                        | Basal (week 0) |      | 2g OM-3 (week 8) |      |           | Follow up (week 16) |      |           |           |
|------------------------|----------------|------|------------------|------|-----------|---------------------|------|-----------|-----------|
|                        | Mean           | SEM  | Mean             | SEM  | p (vs W0) | Mean                | SEM  | p (vs W0) | p (vs W8) |
| <b>C14:0</b>           | <b>0.43</b>    | 0.03 | <b>0.38</b>      | 0.03 | ns        | <b>0.37</b>         | 0.04 | ns        | ns        |
| <b>C16:0</b>           | <b>20.97</b>   | 0.23 | <b>20.77</b>     | 0.31 | ns        | <b>21.38</b>        | 0.25 | ns        | ns        |
| <b>C16:1 n-7</b>       | <b>0.67</b>    | 0.16 | <b>0.32</b>      | 0.04 | ns        | <b>0.47</b>         | 0.06 | ns        | ns        |
| <b>C18:0</b>           | <b>15.18</b>   | 0.30 | <b>15.15</b>     | 0.25 | ns        | <b>15.29</b>        | 0.33 | ns        | ns        |
| <b>C18:1 n-9</b>       | <b>15.70</b>   | 0.27 | <b>14.77</b>     | 0.39 | = 0.048   | <b>15.71</b>        | 0.18 | ns        | ns        |
| <b>C18:2 n-6</b>       | <b>12.74</b>   | 0.45 | <b>11.95</b>     | 0.44 | = 0.007   | <b>12.61</b>        | 0.39 | ns        | ns        |
| <b>C18:3 n-6</b>       | <b>0.10</b>    | 0.02 | <b>0.11</b>      | 0.04 | ns        | <b>0.11</b>         | 0.01 | ns        | ns        |
| <b>C20:1 n-9</b>       | <b>0.20</b>    | 0.01 | <b>0.24</b>      | 0.09 | ns        | <b>0.20</b>         | 0.01 | ns        | ns        |
| <b>C18:3 n-3</b>       | <b>0.21</b>    | 0.02 | <b>0.17</b>      | 0.02 | ns        | <b>0.18</b>         | 0.02 | ns        | ns        |
| <b>C20:2 n-6</b>       | <b>0.22</b>    | 0.01 | <b>0.28</b>      | 0.08 | ns        | <b>0.22</b>         | 0.01 | ns        | ns        |
| <b>C20:3 n-6</b>       | <b>1.76</b>    | 0.08 | <b>1.52</b>      | 0.12 | ns        | <b>1.77</b>         | 0.09 | ns        | ns        |
| <b>C20:4 n-6 (AA)</b>  | <b>16.88</b>   | 0.30 | <b>15.96</b>     | 0.25 | = 0.038   | <b>15.65</b>        | 0.29 | = 0.012   | ns        |
| <b>C24:0</b>           | <b>1.28</b>    | 0.09 | <b>1.19</b>      | 0.10 | ns        | <b>1.40</b>         | 0.10 | ns        | ns        |
| <b>C20:5 n-3 (EPA)</b> | <b>0.69</b>    | 0.04 | <b>2.32</b>      | 0.11 | < 0.001   | <b>1.06</b>         | 0.06 | < 0.001   | < 0.001   |
| <b>C24:1 n-9</b>       | <b>1.45</b>    | 0.10 | <b>1.38</b>      | 0.08 | ns        | <b>1.40</b>         | 0.05 | ns        | ns        |
| <b>C22:4 n-6</b>       | <b>3.00</b>    | 0.10 | <b>2.68</b>      | 0.11 | = 0.038   | <b>2.47</b>         | 0.10 | < 0.001   | ns        |
| <b>C22:5 n-6</b>       | <b>0.69</b>    | 0.04 | <b>0.64</b>      | 0.09 | ns        | <b>0.56</b>         | 0.04 | = 0.006   | ns        |
| <b>C22:5 n-3</b>       | <b>2.65</b>    | 0.09 | <b>3.04</b>      | 0.07 | < 0.001   | <b>2.84</b>         | 0.07 | = 0.015   | = 0.020   |
| <b>C22:6 n-3 (DHA)</b> | <b>4.25</b>    | 0.18 | <b>6.10</b>      | 0.18 | < 0.001   | <b>5.56</b>         | 0.18 | < 0.001   | < 0.001   |

**Table S3: Effect of EPA/DHA supplementation on the CYP-eicosanoid profile in plasma.** The concentration of the metabolites is given in ng/ml as mean  $\pm$  SEM, n=19. A general linear model for repeated measurements was used for analysis. p<0.05 was considered significant with \* vs week 0 and # vs week 8. Week 0 = basal, week 8 = maximum treatment and week 16 = follow-up.

|               |      | <i>Epoxymetabolite</i> |               |                 | <i>Diol</i>   |               |                 | <i>Ratio Diol/Epoxymetabolite</i> |               |                |
|---------------|------|------------------------|---------------|-----------------|---------------|---------------|-----------------|-----------------------------------|---------------|----------------|
|               |      | <i>Week 0</i>          | <i>Week 8</i> | <i>Week 16</i>  | <i>Week 0</i> | <i>Week 8</i> | <i>Week 16</i>  | <i>Week 0</i>                     | <i>Week 8</i> | <i>Week 16</i> |
| <b>AA</b>     |      |                        | <b>EET</b>    |                 | <b>DHET</b>   |               | <b>DHET/EET</b> |                                   |               |                |
| <b>14,15-</b> | Mean | <b>2.64</b>            | <b>2.40</b>   | <b>2.37</b>     | <b>0.60</b>   | <b>0.57</b>   | <b>0.60</b>     | 0.23                              | 0.24          | 0.25           |
|               | SEM  | 0.24                   | 0.22          | 0.21            | 0.03          | 0.03          | 0.03            |                                   |               |                |
| <b>11,12-</b> | Mean | <b>1.72</b>            | <b>1.44 *</b> | <b>1.42 *</b>   | <b>0.64</b>   | <b>0.57 *</b> | <b>0.60</b>     | 0.37                              | 0.40          | 0.42           |
|               | SEM  | 0.13                   | 0.13          | 0.12            | 0.04          | 0.03          | 0.03            |                                   |               |                |
| <b>8,9-</b>   | Mean | <b>3.28</b>            | <b>2.90</b>   | <b>2.96</b>     | <b>1.94</b>   | <b>1.70</b>   | <b>1.87</b>     | 0.59                              | 0.59          | 0.63           |
|               | SEM  | 0.29                   | 0.25          | 0.26            | 0.11          | 0.10          | 0.13            |                                   |               |                |
| <b>5,6-</b>   | Mean | <b>1.26</b>            | <b>1.00 *</b> | <b>1.07 *</b>   | <b>5.36</b>   | <b>4.85</b>   | <b>5.26</b>     | 4.24                              | 4.87          | 4.91           |
|               | SEM  | 0.13                   | 0.07          | 0.12            | 0.41          | 0.49          | 0.47            |                                   |               |                |
| <b>EPA</b>    |      |                        | <b>EEQ</b>    |                 | <b>DHEQ</b>   |               | <b>DHEQ/EEQ</b> |                                   |               |                |
| <b>17,18-</b> | Mean | <b>0.27</b>            | <b>1.34 *</b> | <b>0.30 #</b>   | <b>1.61</b>   | <b>4.81 *</b> | <b>1.78 #</b>   | 6.07                              | 3.58          | 6.00           |
|               | SEM  | 0.07                   | 0.12          | 0.06            | 0.20          | 0.39          | 0.23            |                                   |               |                |
| <b>14,15-</b> | Mean | <b>0.09</b>            | <b>0.55 *</b> | <b>0.10 #</b>   | <b>0.30</b>   | <b>1.63 *</b> | <b>0.39 #</b>   | 3.33                              | 2.95          | 3.89           |
|               | SEM  | 0.02                   | 0.05          | 0.02            | 0.07          | 0.23          | 0.06            |                                   |               |                |
| <b>11,12-</b> | Mean | <b>0.07</b>            | <b>0.61 *</b> | <b>0.16 * #</b> | <b>0.01</b>   | <b>0.04 *</b> | <b>0.01 #</b>   | 0.18                              | 0.06          | 0.08           |
|               | SEM  | 0.02                   | 0.07          | 0.02            | 0.00          | 0.00          | 0.00            |                                   |               |                |
| <b>8,9-</b>   | Mean | <b>0.08</b>            | <b>0.49 *</b> | <b>0.08 #</b>   | <b>0.02</b>   | <b>0.07 *</b> | <b>0.02 #</b>   | 0.23                              | 0.15          | 0.27           |
|               | SEM  | 0.04                   | 0.09          | 0.03            | 0.00          | 0.01          | 0.00            |                                   |               |                |
| <b>5,6-</b>   | Mean | <b>0.91</b>            | <b>3.61 *</b> | <b>1.12 #</b>   | <b>1.56</b>   | <b>6.04 *</b> | <b>1.97 #</b>   | 1.71                              | 1.67          | 1.77           |
|               | SEM  | 0.18                   | 0.34          | 0.19            | 0.20          | 0.76          | 0.25            |                                   |               |                |
| <b>DHA</b>    |      |                        | <b>EDP</b>    |                 | <b>DHDP</b>   |               | <b>DHDP/EDP</b> |                                   |               |                |
| <b>19,20-</b> | Mean | <b>0.74</b>            | <b>1.60 *</b> | <b>0.83 #</b>   | <b>0.49</b>   | <b>0.92 *</b> | <b>0.60 * #</b> | 0.67                              | 0.57          | 0.72           |
|               | SEM  | 0.08                   | 0.14          | 0.13            | 0.05          | 0.06          | 0.07            |                                   |               |                |
| <b>16,17-</b> | Mean | <b>1.71</b>            | <b>3.39 *</b> | <b>1.48 #</b>   | <b>0.13</b>   | <b>0.28 *</b> | <b>0.17 * #</b> | 0.08                              | 0.08          | 0.12           |
|               | SEM  | 0.29                   | 0.39          | 0.30            | 0.02          | 0.03          | 0.02            |                                   |               |                |
| <b>13,14-</b> | Mean | <b>0.36</b>            | <b>0.92 *</b> | <b>0.47 #</b>   | <b>nd</b>     | <b>nd</b>     | <b>nd</b>       | nd                                | nd            | nd             |
|               | SEM  | 0.07                   | 0.09          | 0.07            | nd            | nd            | nd              |                                   |               |                |
| <b>10,11-</b> | Mean | <b>0.39</b>            | <b>0.83 *</b> | <b>0.41 #</b>   | <b>0.17</b>   | <b>0.31 *</b> | <b>0.20 #</b>   | 0.44                              | 0.37          | 0.48           |
|               | SEM  | 0.03                   | 0.08          | 0.03            | 0.02          | 0.02          | 0.02            |                                   |               |                |
| <b>7,8-</b>   | Mean | <b>0.77</b>            | <b>1.67 *</b> | <b>1.03 * #</b> | <b>0.65</b>   | <b>1.34 *</b> | <b>0.77 * #</b> | 0.84                              | 0.80          | 0.75           |
|               | SEM  | 0.08                   | 0.16          | 0.11            | 0.07          | 0.10          | 0.07            |                                   |               |                |

**Table S4: Effect of EPA/DHA supplementation on the eicosanoid profile in urine.** The concentration of the metabolites is given in ng/ml as mean  $\pm$  SEM, n=19. A general linear model for repeated measurements was used for analysis.  $p < 0.05$  was considered significant with \* week 0 and # vs week 8. Week 0 = basal, week 8 = maximum treatment and week 16 = follow-up.

|               |      | Week 0                                                      | Week 8        | Week 16       | Week 0      | Week 8        | Week 16       |
|---------------|------|-------------------------------------------------------------|---------------|---------------|-------------|---------------|---------------|
| <b>AA</b>     |      | <b>EET</b>                                                  |               |               | <b>DHET</b> |               |               |
| <b>14,15-</b> | Mean | nd                                                          | nd            | nd            | <b>0.25</b> | <b>0.29</b>   | <b>0.26</b>   |
|               | SEM  |                                                             |               |               | 0.02        | 0.05          | 0.03          |
| <b>11,12-</b> | Mean | nd                                                          | nd            | nd            | <b>0.05</b> | <b>0.05</b>   | <b>0.05</b>   |
|               | SEM  |                                                             |               |               | 0.01        | 0.01          | 0.01          |
| <b>8,9-</b>   | Mean | <b>0.01</b>                                                 | <b>0.02</b>   | <b>0.03</b>   | <b>0.84</b> | <b>0.84</b>   | <b>0.75</b>   |
|               | SEM  | 0.01                                                        | 0.01          | 0.02          | 0.11        | 0.15          | 0.12          |
| <b>5,6-</b>   | Mean | nd                                                          | nd            | nd            | <b>0.10</b> | <b>0.08</b>   | <b>0.08</b>   |
|               | SEM  |                                                             |               |               | 0.02        | 0.02          | 0.01          |
| <b>20-</b>    |      | <b>HETE</b>                                                 |               |               |             |               |               |
|               | Mean | <b>0.09</b>                                                 | <b>0.11</b>   | <b>0.09</b>   |             |               |               |
|               | SEM  | 0.02                                                        | 0.02          | 0.02          |             |               |               |
| <b>PGI2</b>   |      | <b>6-keto-PGF1<math>\alpha</math></b>                       |               |               |             |               |               |
|               | Mean | <b>0.42</b>                                                 | <b>0.45</b>   | <b>0.32</b>   |             |               |               |
|               | SEM  | 0.14                                                        | 0.19          | 0.12          |             |               |               |
| <b>EPA</b>    |      | <b>EEQ</b>                                                  |               |               | <b>DHEQ</b> |               |               |
| <b>17,18-</b> | Mean | nd                                                          | nd            | nd            | <b>0.31</b> | <b>1.24 *</b> | <b>0.32 #</b> |
|               | SEM  |                                                             |               |               | 0.05        | 0.23          | 0.07          |
| <b>14,15-</b> | Mean | nd                                                          | nd            | nd            | <b>0.04</b> | <b>0.24 *</b> | <b>0.05 #</b> |
|               | SEM  |                                                             |               |               | 0.02        | 0.06          | 0.01          |
| <b>11,12-</b> | Mean | nd                                                          | nd            | nd            | nd          | <b>0.02</b>   | nd            |
|               | SEM  |                                                             |               |               |             | 0.00          |               |
| <b>8,9-</b>   | Mean | nd                                                          | <b>0.01</b>   | <b>0.01</b>   | <b>0.04</b> | <b>0.22 *</b> | <b>0.04 #</b> |
|               | SEM  |                                                             | 0.00          | 0.01          | 0.00        | 0.04          | 0.01          |
| <b>5,6-</b>   | Mean | nd                                                          | nd            | nd            | <b>0.17</b> | <b>1.00 *</b> | <b>0.17 #</b> |
|               | SEM  |                                                             |               |               | 0.05        | 0.21          | 0.04          |
| <b>20-</b>    |      | <b>HEPE</b>                                                 |               |               |             |               |               |
|               | Mean | <b>0.07</b>                                                 | <b>0.24 *</b> | <b>0.08 #</b> |             |               |               |
|               | SEM  | 0.02                                                        | 0.05          | 0.02          |             |               |               |
| <b>PGI3</b>   |      | <b><math>\Delta</math>17-6-keto-PGF1<math>\alpha</math></b> |               |               |             |               |               |
|               | Mean | <b>0.74</b>                                                 | <b>1.14</b>   | <b>0.78</b>   |             |               |               |
|               | SEM  | 0.40                                                        | 0.40          | 0.35          |             |               |               |
| <b>DHA</b>    |      | <b>EDP</b>                                                  |               |               | <b>DHDP</b> |               |               |
| <b>19,20-</b> | Mean | nd                                                          | nd            | nd            | <b>0.06</b> | <b>0.12 *</b> | <b>0.08</b>   |
|               | SEM  |                                                             |               |               | 0.02        | 0.02          | 0.01          |
| <b>16,17-</b> | Mean | nd                                                          | nd            | nd            | <b>0.02</b> | <b>0.03</b>   | <b>0.03</b>   |
|               | SEM  |                                                             |               |               | 0.00        | 0.01          | 0.01          |
| <b>13,14-</b> | Mean | nd                                                          | nd            | nd            | <b>0.15</b> | <b>0.16</b>   | <b>0.19</b>   |
|               | SEM  |                                                             |               |               | 0.07        | 0.07          | 0.08          |
| <b>10,11-</b> | Mean | nd                                                          | nd            | nd            | <b>0.10</b> | <b>0.43 *</b> | <b>0.14 #</b> |
|               | SEM  |                                                             |               |               | 0.01        | 0.08          | 0.03          |
| <b>7,8-</b>   | Mean | <b>0.01</b>                                                 | <b>0.01</b>   | <b>0.01</b>   | <b>0.39</b> | <b>0.52 *</b> | <b>0.25 #</b> |
|               | SEM  | 0.01                                                        | 0.01          | 0.01          | 0.22        | 0.30          | 0.12          |
| <b>22-</b>    |      | <b>HDHA</b>                                                 |               |               |             |               |               |
|               | Mean | <b>0.04</b>                                                 | <b>0.11</b>   | <b>0.03</b>   |             |               |               |
|               | SEM  | 0.03                                                        | 0.04          | 0.01          |             |               |               |
